# Supplementary material
Source: publisher figshare collection journal article supplement (https://asha.figshare.com/articles/dataset/_/24302221)
Supplement: Supplementary file 1 [file 1]

**Supplemental Material S6.** Pairwise comparisons of the proportions of the correct and incorrect response categories for each stimulus type.

|                      | Original |          | Copied      |             | Breathy      |             | Modal       |             | Pressed      |             |
|----------------------|----------|----------|-------------|-------------|--------------|-------------|-------------|-------------|--------------|-------------|
|                      | <i>t</i> | <i>p</i> | <i>t</i>    | <i>p</i>    | <i>t</i>     | <i>p</i>    | <i>t</i>    | <i>p</i>    | <i>t</i>     | <i>p</i>    |
| <b>Happiness</b>     |          |          |             |             |              |             |             |             |              |             |
| Happiness–anger      | 28.89    | < .001   | 5.72        | < .001      | 3.96         | < .01       | 5.26        | < .001      | <b>−0.20</b> | <b>n.s.</b> |
| Happiness–fear       | 28.89    | < .001   | 3.85        | < .01       | <b>−0.58</b> | <b>n.s.</b> | 4.21        | < .001      | 4.85         | < .001      |
| Happiness–sadness    | 28.89    | < .001   | 5.23        | < .001      | 3.67         | < .01       | 6.40        | < .001      | 5.18         | < .001      |
| Happiness–neutrality | 7.34     | < .001   | <b>0.51</b> | <b>n.s.</b> | <b>0.80</b>  | <b>n.s.</b> | <b>0.84</b> | <b>n.s.</b> | <b>0.85</b>  | <b>n.s.</b> |
| Anger–fear           | —        | —        | −1.49       | n.s.        | −6.03        | < .001      | −1.62       | n.s.        | 5.94         | < .001      |
| Anger–sadness        | —        | —        | −0.01       | n.s.        | −0.93        | n.s.        | 0.92        | n.s.        | 6.45         | < .001      |
| Anger–neutrality     | −14.34   | < .001   | −4.64       | < .001      | −3.92        | < .01       | −4.53       | < .001      | 1.12         | n.s.        |
| Fear–sadness         | —        | —        | 1.72        | n.s.        | 4.21         | < .001      | 2.67        | n.s.        | 0.64         | n.s.        |
| Fear–neutrality      | −14.34   | < .001   | −3.35       | < .05       | 1.49         | n.s.        | −2.91       | n.s.        | −5.42        | < .001      |
| Sadness–neutrality   | −14.34   | < .001   | −4.84       | < .001      | −3.07        | < .05       | −5.33       | < .001      | −6.04        | < .001      |
|                      |          |          |             |             |              |             |             |             |              |             |
|                      | Original |          | Copied      |             | Breathy      |             | Modal       |             | Pressed      |             |
|                      | <i>t</i> | <i>p</i> | <i>t</i>    | <i>p</i>    | <i>t</i>     | <i>p</i>    | <i>t</i>    | <i>p</i>    | <i>t</i>     | <i>p</i>    |
| <b>Anger</b>         |          |          |             |             |              |             |             |             |              |             |
| Anger–happiness      | 10.10    | < .001   | 6.77        | < .001      | 5.13         | < .001      | 5.68        | < .001      | 8.91         | < .001      |
| Anger–fear           | 20.66    | < .001   | 7.45        | < .001      | <b>0.91</b>  | <b>n.s.</b> | 7.20        | < .001      | 13.33        | < .001      |
| Anger–sadness        | 20.42    | < .001   | 11.55       | < .001      | 7.06         | < .001      | 10.23       | < .001      | 13.96        | < .001      |
| Anger–neutrality     | 9.19     | < .001   | 3.79        | < .01       | 4.35         | < .001      | 4.23        | < .001      | 8.72         | < .001      |
| Happiness–fear       | 5.31     | < .001   | 0.39        | n.s.        | −4.22        | < .001      | 0.36        | n.s.        | 3.30         | < .05       |
| Happiness–sadness    | 5.02     | < .001   | 4.08        | < .01       | 2.14         | n.s.        | 3.72        | < .01       | 5.22         | < .001      |
| Happiness–neutrality | −1.43    | n.s.     | −2.15       | n.s.        | −0.70        | n.s.        | −2.17       | n.s.        | −0.03        | n.s.        |
| Fear–sadness         | −0.98    | n.s.     | 3.59        | < .01       | 7.54         | < .001      | 3.03        | < .05       | 1.42         | n.s.        |
| Fear–neutrality      | −7.96    | < .001   | −3.10       | < .05       | 3.80         | < .01       | −2.68       | n.s.        | −3.38        | < .05       |
| Sadness–neutrality   | −7.70    | < .001   | −6.71       | < .001      | −2.60        | n.s.        | −7.37       | < .001      | −4.46        | < .001      |

| <b>Fear</b>          | Original |          | Copied      |             | Breathy  |          | Modal       |             | Pressed      |                  |
|----------------------|----------|----------|-------------|-------------|----------|----------|-------------|-------------|--------------|------------------|
|                      | <i>t</i> | <i>p</i> | <i>t</i>    | <i>p</i>    | <i>t</i> | <i>p</i> | <i>t</i>    | <i>p</i>    | <i>t</i>     | <i>p</i>         |
| Fear–happiness       | 23.70    | < .001   | 4.63        | < .001      | 7.39     | < .001   | 5.69        | < .001      | 0.61         | n.s.             |
| Fear–anger           | 21.60    | < .001   | <b>1.42</b> | <b>n.s.</b> | 4.73     | < .001   | <b>1.74</b> | <b>n.s.</b> | <b>–5.02</b> | <b>&lt; .001</b> |
| Fear–sadness         | 10.88    | < .001   | 3.38        | < .05       | 5.85     | < .001   | 5.30        | < .001      | –0.17        | n.s.             |
| Fear–neutrality      | 21.23    | < .001   | 4.22        | < .001      | 7.40     | < .001   | 4.10        | < .001      | 0.41         | n.s.             |
| Happiness–anger      | 0.04     | n.s.     | –3.38       | < .05       | –3.25    | < .05    | –3.20       | < .05       | –5.20        | < .001           |
| Happiness–sadness    | –7.49    | < .001   | –1.07       | n.s.        | –1.66    | n.s.     | –0.52       | n.s.        | –0.76        | n.s.             |
| Happiness–neutrality | –1.13    | n.s.     | –0.37       | n.s.        | 0.82     | n.s.     | –0.64       | n.s.        | –0.15        | n.s.             |
| Anger–sadness        | –7.31    | < .001   | 2.11        | n.s.        | 1.29     | n.s.     | 2.76        | n.s.        | 4.02         | < .01            |
| Anger–neutrality     | –1.12    | n.s.     | 2.66        | n.s.        | 4.11     | < .001   | 2.56        | n.s.        | 4.55         | < .001           |
| Sadness–neutrality   | 6.86     | < .001   | 0.78        | n.s.        | 2.75     | n.s.     | –0.24       | n.s.        | 0.64         | n.s.             |

  

| <b>Sadness</b>       | Original |          | Copied   |          | Breathy  |          | Modal    |          | Pressed  |          |
|----------------------|----------|----------|----------|----------|----------|----------|----------|----------|----------|----------|
|                      | <i>t</i> | <i>p</i> |
| Sadness–happiness    | 31.82    | < .001   | 21.84    | < .001   | 22.48    | < .001   | 26.95    | < .001   | 26.35    | < .001   |
| Sadness–anger        | 31.82    | < .001   | 21.84    | < .001   | 22.48    | < .001   | 26.95    | < .001   | 26.35    | < .001   |
| Sadness–fear         | 11.13    | < .001   | 7.24     | < .001   | 5.65     | < .001   | 9.51     | < .001   | 9.46     | < .001   |
| Sadness–neutrality   | 31.82    | < .001   | 13.97    | < .001   | 13.43    | < .001   | 14.95    | < .001   | 13.43    | < .001   |
| Happiness–anger      | —        | —        | —        | —        | —        | —        | —        | —        | —        | —        |
| Happiness–fear       | –9.55    | < .001   | –8.49    | < .001   | –17.28   | < .001   | –8.83    | < .001   | –10.50   | < .001   |
| Happiness–neutrality | —        | —        | –5.36    | < .001   | –4.92    | < .001   | –5.91    | < .001   | –6.73    | < .001   |
| Anger–fear           | –9.55    | < .001   | –8.49    | < .001   | –17.28   | < .001   | –8.83    | < .001   | –10.50   | < .001   |
| Anger–neutrality     | —        | —        | –5.36    | < .001   | –4.92    | < .001   | –5.91    | < .001   | –6.73    | < .001   |
| Fear–neutrality      | 9.55     | < .001   | 4.57     | < .001   | 9.62     | < .001   | 3.82     | < .01    | 3.53     | < .01    |

| <b>Neutrality (male)</b> | Original |          | Copied   |          | Breathy     |             | Modal    |          | Pressed     |             |
|--------------------------|----------|----------|----------|----------|-------------|-------------|----------|----------|-------------|-------------|
|                          | <i>t</i> | <i>p</i> | <i>t</i> | <i>p</i> | <i>t</i>    | <i>p</i>    | <i>t</i> | <i>p</i> | <i>t</i>    | <i>p</i>    |
| Neutrality–happiness     | 14.22    | < .001   | 9.16     | < .001   | 5.67        | < .001      | 5.79     | < .001   | 6.46        | < .001      |
| Neutrality–anger         | 16.03    | < .001   | 7.30     | < .001   | 4.31        | < .001      | 6.08     | < .001   | <b>2.46</b> | <b>n.s.</b> |
| Neutrality–fear          | 26.61    | < .001   | 9.63     | < .001   | <b>2.79</b> | <b>n.s.</b> | 5.84     | < .001   | 9.41        | < .001      |
| Neutrality–sadness       | 25.84    | < .001   | 10.03    | < .001   | 6.58        | < .001      | 8.66     | < .001   | 7.97        | < .001      |
| Happiness–anger          | 0.52     | n.s.     | –1.12    | n.s.     | –0.67       | n.s.        | 1.05     | n.s.     | –3.61       | < .01       |
| Happiness–fear           | 4.02     | < .01    | 0.52     | n.s.     | –1.69       | n.s.        | 0.30     | n.s.     | 2.90        | n.s.        |
| Happiness–sadness        | 4.26     | < .001   | 0.93     | n.s.     | 0.63        | n.s.        | 2.31     | n.s.     | 1.66        | n.s.        |
| Anger–fear               | 3.68     | < .01    | 1.64     | n.s.     | –1.11       | n.s.        | –0.85    | n.s.     | 6.46        | < .001      |
| Anger–sadness            | 3.68     | < .01    | 2.01     | n.s.     | 1.10        | n.s.        | 1.31     | n.s.     | 5.58        | < .001      |
| Fear–sadness             | –0.38    | n.s.     | 0.26     | n.s.     | 2.18        | n.s.        | 2.34     | n.s.     | –1.17       | n.s.        |

| <b>Neutrality (female)</b> | Original |          | Copied   |          | Breathy      |             | Modal    |          | Pressed  |          |
|----------------------------|----------|----------|----------|----------|--------------|-------------|----------|----------|----------|----------|
|                            | <i>t</i> | <i>p</i> | <i>t</i> | <i>p</i> | <i>t</i>     | <i>p</i>    | <i>t</i> | <i>p</i> | <i>t</i> | <i>p</i> |
| Neutrality–happiness       | 16.49    | < .001   | 7.66     | < .001   | 5.25         | < .001      | 6.41     | < .001   | 8.93     | < .001   |
| Neutrality–anger           | 19.19    | < .001   | 6.60     | < .001   | <b>2.58</b>  | <b>n.s.</b> | 4.69     | < .001   | 3.97     | < .01    |
| Neutrality–fear            | 29.64    | < .001   | 7.68     | < .001   | <b>–0.23</b> | <b>n.s.</b> | 6.08     | < .001   | 10.39    | < .001   |
| Neutrality–sadness         | 28.94    | < .001   | 9.25     | < .001   | 4.50         | < .001      | 8.87     | < .001   | 10.50    | < .001   |
| Happiness–anger            | 1.38     | n.s.     | –0.31    | n.s.     | –2.36        | n.s.        | –1.77    | n.s.     | –4.36    | < .001   |
| Happiness–fear             | 3.31     | < .05    | 0.00     | n.s.     | –4.87        | < .001      | –0.16    | n.s.     | 0.93     | n.s.     |
| Happiness–sadness          | 3.67     | < .01    | 2.04     | n.s.     | –1.37        | n.s.        | 1.72     | n.s.     | 1.66     | n.s.     |
| Anger–fear                 | 1.73     | n.s.     | 0.31     | n.s.     | <b>–2.87</b> | <b>n.s.</b> | 1.88     | n.s.     | 5.59     | < .001   |
| Anger–sadness              | 1.83     | n.s.     | 2.04     | n.s.     | 1.17         | n.s.        | 3.67     | < .01    | 6.42     | < .001   |
| Fear–sadness               | 0.00     | n.s.     | 1.85     | n.s.     | 4.10         | < .001      | 2.23     | n.s.     | 0.79     | n.s.     |

*Note.* *t* = *t*-value; *p* = *p*-value; n.s. = not significant.
