# Supplementary material
Source: publisher figshare collection journal article supplement (https://asha.figshare.com/articles/dataset/_/24302221)
Supplement: Supplementary file 2 [file 1]

**Supplemental Material S1.** Intensity ratings in the total sample and in male and female decoders, respectively.

| Emotion   | Type     | All ( <i>N</i> = 55) | Male ( <i>n</i> = 28) | Female ( <i>n</i> = 27) |
|-----------|----------|----------------------|-----------------------|-------------------------|
| Happiness | Original | 5.26 (1.65)          | 5.26 (1.67)           | 5.26 (1.64)             |
|           | Copied   | 4.67 (1.50)          | 4.45 (1.51)           | 4.86 (1.47)             |
|           | Breathy  | 4.39 (1.72)          | 4.49 (1.67)           | 4.29 (1.79)             |
|           | Modal    | 4.18 (1.58)          | 4.26 (1.40)           | 4.10 (1.73)             |
|           | Pressed  | 4.55 (1.61)          | 4.63 (1.50)           | 4.48 (1.72)             |
| Anger     | Original | 4.87 (1.68)          | 4.74 (1.66)           | 5.00 (1.70)             |
|           | Copied   | 4.17 (1.56)          | 4.31 (1.44)           | 4.05 (1.65)             |
|           | Breathy  | 4.60 (1.53)          | 4.87 (1.36)           | 4.35 (1.65)             |
|           | Modal    | 4.56 (1.70)          | 4.70 (1.62)           | 4.43 (1.76)             |
|           | Pressed  | 4.63 (1.61)          | 4.68 (1.52)           | 4.59 (1.69)             |
| Fear      | Original | 4.86 (1.62)          | 4.81 (1.65)           | 4.89 (1.60)             |
|           | Copied   | 4.01 (1.66)          | 4.08 (1.54)           | 3.96 (1.76)             |
|           | Breathy  | 4.90 (1.63)          | 4.85 (1.51)           | 4.93 (1.72)             |
|           | Modal    | 4.30 (1.71)          | 4.25 (1.71)           | 4.35 (1.71)             |
|           | Pressed  | 4.46 (1.83)          | 4.27 (1.74)           | 4.62 (1.91)             |
| Sadness   | Original | 6.09 (1.14)          | 5.98 (1.09)           | 6.19 (1.18)             |
|           | Copied   | 4.21 (1.60)          | 4.24 (1.53)           | 4.18 (1.66)             |
|           | Breathy  | 4.47 (1.74)          | 4.68 (1.61)           | 4.26 (1.84)             |
|           | Modal    | 4.59 (1.71)          | 4.73 (1.57)           | 4.46 (1.83)             |
|           | Pressed  | 4.68 (1.65)          | 4.73 (1.57)           | 4.64 (1.73)             |

*Note.* Means (standard deviations) are shown.
