# Supplementary material
Source: publisher figshare collection journal article supplement (https://asha.figshare.com/articles/dataset/_/24302221)
Supplement: Supplementary file 3 [file 1]

**Supplemental Material S5.** Pairwise comparisons of the correct response proportions of the target emotions for different stimulus type pairs.

|                  | Happiness    |                  | Anger        |                  | Fear         |                  | Sadness      |                  | Neutrality<br>(male) |                  | Neutrality<br>(female) |                  |
|------------------|--------------|------------------|--------------|------------------|--------------|------------------|--------------|------------------|----------------------|------------------|------------------------|------------------|
|                  | <i>t</i>     | <i>p</i>         | <i>t</i>     | <i>p</i>         | <i>t</i>     | <i>p</i>         | <i>t</i>     | <i>p</i>         | <i>t</i>             | <i>p</i>         | <i>t</i>               | <i>p</i>         |
| Original–copied  | <b>11.48</b> | <b>&lt; .001</b> | <b>6.3</b>   | <b>&lt; .001</b> | <b>11.46</b> | <b>&lt; .001</b> | <b>3.57</b>  | <b>&lt; .01</b>  | <b>5.14</b>          | <b>&lt; .001</b> | <b>8.74</b>            | <b>&lt; .001</b> |
| Original–breathy | <b>12.31</b> | <b>&lt; .001</b> | <b>8.17</b>  | <b>&lt; .001</b> | <b>8.15</b>  | <b>&lt; .001</b> | <b>5.65</b>  | <b>&lt; .001</b> | <b>8.27</b>          | <b>&lt; .001</b> | <b>12.38</b>           | <b>&lt; .001</b> |
| Original–modal   | <b>10.42</b> | <b>&lt; .001</b> | <b>6.99</b>  | <b>&lt; .001</b> | <b>12.36</b> | <b>&lt; .001</b> | 2.87         | 0.059            | <b>6.00</b>          | <b>&lt; .001</b> | <b>8.40</b>            | <b>&lt; .001</b> |
| Original–pressed | <b>10.71</b> | <b>&lt; .001</b> | <b>3.25</b>  | <b>&lt; .05</b>  | <b>13.86</b> | <b>&lt; .001</b> | <b>3.32</b>  | <b>&lt; .05</b>  | <b>9.44</b>          | <b>&lt; .001</b> | <b>10.24</b>           | <b>&lt; .001</b> |
| Copied–breathy   | 1.84         | n.s.             | 2.54         | n.s.             | <b>−4.29</b> | <b>&lt; .001</b> | 2.73         | n.s.             | <b>3.56</b>          | <b>&lt; .01</b>  | <b>4.45</b>            | <b>&lt; .001</b> |
| Copied–modal     | −0.67        | n.s.             | 0.60         | n.s.             | −0.82        | n.s.             | −0.92        | n.s.             | 1.65                 | n.s.             | 0.66                   | n.s.             |
| Copied–pressed   | 1.08         | n.s.             | <b>−4.75</b> | <b>&lt; .001</b> | <b>4.22</b>  | <b>&lt; .001</b> | 0.03         | n.s.             | <b>4.27</b>          | <b>&lt; .001</b> | 0.82                   | n.s.             |
| Breathy–modal    | −2.73        | n.s.             | −2.50        | n.s.             | <b>3.22</b>  | <b>&lt; .05</b>  | <b>−3.39</b> | <b>&lt; .05</b>  | −2.31                | n.s.             | <b>−4.02</b>           | <b>&lt; .01</b>  |
| Breathy–pressed  | −0.76        | n.s.             | <b>−7.13</b> | <b>&lt; .001</b> | <b>6.70</b>  | <b>&lt; .001</b> | −2.89        | 0.055            | −0.58                | n.s.             | <b>−3.98</b>           | <b>&lt; .01</b>  |
| Modal–pressed    | 1.52         | n.s.             | <b>−5.74</b> | <b>&lt; .001</b> | <b>5.76</b>  | <b>&lt; .001</b> | 0.95         | n.s.             | −0.53                | n.s.             | 0.07                   | n.s.             |

*Note.* *t* = *t*-value; *p* = *p*-value; n.s. = not significant. Significant results are shown in bold.
