# Supplementary material
Source: publisher figshare collection journal article supplement (https://asha.figshare.com/articles/dataset/_/24302221)
Supplement: Supplementary file 4 [file 1]

**Supplemental Material S4.** Summary of repeated-measures ANOVAs for the proportions of emotion categorization responses.

| <b>Happiness</b>                                      | <i>F</i> | <i>df1</i> | <i>df2</i> | <i>p</i> | $\eta_p^2$ |
|-------------------------------------------------------|----------|------------|------------|----------|------------|
| Gender of Decoder                                     | 0.00     | 1          | 53         | n.s.     | .000       |
| Response Category                                     | 54.80    | 2.98       | 157.97     | < .001   | .508       |
| Stimulus Type                                         | 0.00     | 4          | 212        | n.s.     | .000       |
| Gender of Decoder × Response Category                 | 0.58     | 2.98       | 157.97     | n.s.     | .011       |
| Gender of Decoder × Stimulus Type                     | 0.00     | 4          | 212        | n.s.     | .000       |
| Response Category × Stimulus Type                     | 35.28    | 10.64      | 564.12     | < .001   | .400       |
| Gender of Decoder × Response Category × Stimulus Type | 1.21     | 10.64      | 564.12     | n.s.     | .021       |
| <b>Anger</b>                                          | <i>F</i> | <i>df1</i> | <i>df2</i> | <i>p</i> | $\eta_p^2$ |
| Gender of Decoder                                     | 0.00     | 1          | 53         | n.s.     | .000       |
| Response Category                                     | 98.26    | 2.71       | 143.39     | < .001   | .650       |
| Stimulus Type                                         | 0.00     | 4          | 212        | n.s.     | .000       |
| Gender of Decoder × Response Category                 | 1.53     | 2.71       | 143.39     | n.s.     | .028       |
| Gender of Decoder × Stimulus Type                     | 0.00     | 4          | 212        | n.s.     | .000       |
| Response Category × Stimulus Type                     | 20.68    | 9.17       | 485.83     | < .001   | .281       |
| Gender of Decoder × Response Category × Stimulus Type | 0.32     | 9.17       | 485.83     | n.s.     | .006       |
| <b>Fear</b>                                           | <i>F</i> | <i>df1</i> | <i>df2</i> | <i>p</i> | $\eta_p^2$ |
| Gender of Decoder                                     | 3.30     | 1          | 53         | .075     | .059       |
| Response Category                                     | 42.14    | 3.63       | 192.28     | < .001   | .443       |
| Stimulus Type                                         | 1.09     | 4          | 212        | n.s.     | .020       |
| Gender of Decoder × Response Category                 | 2.25     | 3.63       | 192.28     | .072     | .041       |
| Gender of Decoder × Stimulus Type                     | 0.50     | 4          | 212        | n.s.     | .009       |
| Response Category × Stimulus Type                     | 35.50    | 10.13      | 536.87     | < .001   | .401       |
| Gender of Decoder × Response Category × Stimulus Type | 0.65     | 10.13      | 536.87     | n.s.     | .012       |
| <b>Sadness</b>                                        | <i>F</i> | <i>df1</i> | <i>df2</i> | <i>p</i> | $\eta_p^2$ |
| Gender of Decoder                                     | 0.00     | 1          | 53         | n.s.     | .000       |
| Response Category                                     | 373.27   | 4          | 212        | < .001   | .876       |
| Stimulus Type                                         | 0.00     | 4          | 212        | n.s.     | .000       |
| Gender of Decoder × Response Category                 | 0.93     | 4          | 212        | n.s.     | .017       |
| Gender of Decoder × Stimulus Type                     | 0.00     | 4          | 212        | n.s.     | .000       |
| Response Category × Stimulus Type                     | 10.14    | 16         | 848        | < .001   | .161       |
| Gender of Decoder × Response Category × Stimulus Type | 0.53     | 16         | 848        | n.s.     | .010       |
| <b>Neutrality</b>                                     | <i>F</i> | <i>df1</i> | <i>df2</i> | <i>p</i> | $\eta_p^2$ |
| Gender of Decoder                                     | 0.00     | 1          | 53         | n.s.     | .000       |
| Response Category                                     | 186.10   | 3          | 158.96     | < .001   | .778       |
| Stimulus Type                                         | 0.00     | 4          | 212        | n.s.     | .000       |
| Gender of Decoder × Response Category                 | 0.72     | 3          | 158.96     | n.s.     | .013       |
| Gender of Decoder × Stimulus Type                     | 0.00     | 4          | 212        | n.s.     | .000       |

|                                                       |       |       |        |        |      |
|-------------------------------------------------------|-------|-------|--------|--------|------|
| Response Category × Stimulus Type                     | 33.12 | 10.13 | 536.92 | < .001 | .385 |
| Gender of Decoder × Response Category × Stimulus Type | 2.14  | 10.13 | 536.92 | < .05  | .039 |

---

*Note.*  $F$  =  $F$ -value;  $df$  = degree of freedom;  $p$  =  $p$ -value;  $\eta_p^2$  = partial eta-squared; n.s. = not significant.
