# Supplementary material
Source: publisher figshare collection journal article supplement (https://asha.figshare.com/articles/dataset/_/24302221)
Supplement: Supplementary file 5 [file 1]

**Supplemental Material S2.** Post-hoc comparisons between emotion pairs for each acoustic parameter (except intensity range).

|                      | Mean F0     |                 | F0 range    |             | Mean intensity |                  | Speech rate  |                 |
|----------------------|-------------|-----------------|-------------|-------------|----------------|------------------|--------------|-----------------|
|                      | <i>t</i>    | <i>p</i>        | <i>t</i>    | <i>p</i>    | <i>t</i>       | <i>p</i>         | <i>t</i>     | <i>p</i>        |
| Happiness–anger      | 1.05        | n.s.            | 2.70        | n.s.        | 2.26           | n.s.             | <b>–5.42</b> | <b>&lt; .01</b> |
| Happiness–fear       | 0.69        | n.s.            | 2.91        | n.s.        | –0.60          | n.s.             | <b>–4.68</b> | <b>&lt; .01</b> |
| Happiness–sadness    | <b>3.36</b> | <b>&lt; .05</b> | <b>3.03</b> | <b>.064</b> | <b>4.72</b>    | <b>&lt; .01</b>  | –0.24        | n.s.            |
| Happiness–neutrality | 2.68        | n.s.            | 2.21        | n.s.        | <b>6.77</b>    | <b>&lt; .001</b> | –2.97        | n.s.            |
| Anger–fear           | –0.63       | n.s.            | 0.65        | n.s.        | –1.90          | n.s.             | –0.17        | n.s.            |
| Anger–sadness        | <b>4.84</b> | <b>&lt; .01</b> | 1.19        | n.s.        | <b>3.82</b>    | <b>&lt; .05</b>  | <b>3.43</b>  | <b>&lt; .05</b> |
| Anger–neutrality     | 2.89        | n.s.            | –0.86       | n.s.        | <b>5.66</b>    | <b>&lt; .001</b> | 1.85         | n.s.            |
| Fear–sadness         | <b>5.09</b> | <b>&lt; .01</b> | 0.78        | n.s.        | <b>4.32</b>    | <b>&lt; .01</b>  | <b>3.26</b>  | <b>&lt; .05</b> |
| Fear–neutrality      | <b>3.26</b> | <b>&lt; .05</b> | –1.33       | n.s.        | <b>4.43</b>    | <b>&lt; .05</b>  | 1.79         | n.s.            |
| Sadness–neutrality   | –0.74       | n.s.            | –1.63       | n.s.        | –1.64          | n.s.             | –1.84        | n.s.            |

*Note.* *t* = *t*-value; *p* = *p*-value; n.s. = not significant. Significant results are shown in bold.
