# Supplementary material
Source: publisher figshare collection journal article supplement (https://asha.figshare.com/articles/dataset/_/24302221)
Supplement: Supplementary file 6 [file 1]

**Supplemental Material S3.** Post-hoc comparisons between emotion pairs for naturalness and intelligibility, respectively.

|                      | Naturalness  |                  | Intelligibility      |             |
|----------------------|--------------|------------------|----------------------|-------------|
|                      | <i>t</i>     | <i>p</i>         | 95% <i>CI</i>        | <i>p</i>    |
| Happiness–anger      | –0.65        | n.s.             | [–0.15, 0.14]        | n.s.        |
| Happiness–fear       | 2.43         | n.s.             | [–0.22, 0.07]        | n.s.        |
| Happiness–sadness    | <b>3.11</b>  | <b>&lt; .05</b>  | [–0.23, 0.06]        | n.s.        |
| Happiness–neutrality | <b>–4.09</b> | <b>&lt; .001</b> | [–0.09, 0.20]        | n.s.        |
| Anger–fear           | <b>3.15</b>  | <b>&lt; .05</b>  | [–0.22, 0.07]        | n.s.        |
| Anger–sadness        | <b>3.85</b>  | <b>&lt; .01</b>  | [–0.22, 0.06]        | n.s.        |
| Anger–neutrality     | <b>–3.51</b> | <b>&lt; .01</b>  | [–0.09, 0.20]        | n.s.        |
| Fear–sadness         | 0.68         | n.s.             | [–0.15, 0.14]        | n.s.        |
| Fear–neutrality      | <b>–6.71</b> | <b>&lt; .001</b> | [–0.01, 0.27]        | n.s.        |
| Sadness–neutrality   | <b>–7.44</b> | <b>&lt; .001</b> | <b>[–0.01, 0.28]</b> | <b>.069</b> |

*Note.* *t* = *t*-value; *p* = *p*-value; 95% *CI* = 95% confidence interval; n.s. = not significant. Significant results are shown in bold.
